# Supplementary material for: Reduction of methylene blue with Ag nanoparticle-modified microporous polypropylene membranes in a flow-through reactor
Source: Royal Society of Chemistry journal article supplement (doi:10.1039/c7nj01068k), 2017-01-01
Supplement: c7nj01068k1.pdf [file c7nj01068k1.pdf]

## Supporting Information

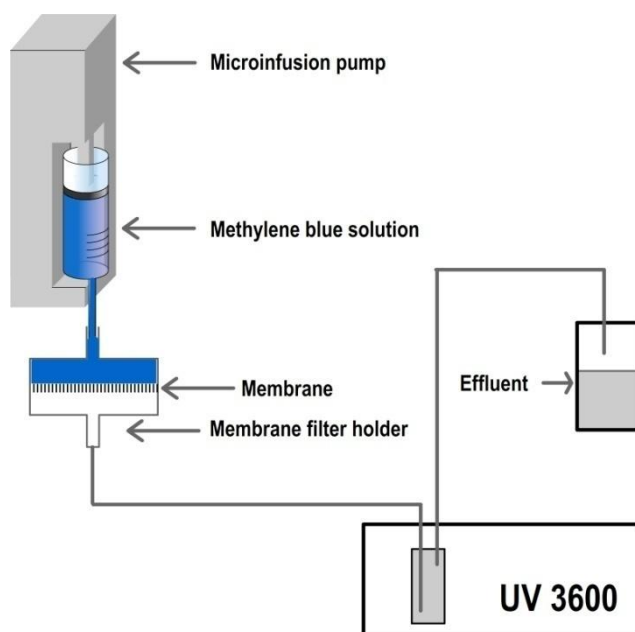

Fig. S1 Apparatus for degradation of methylene blue with AgNPs-immobilized polypropylene microfiltration membranes in a flow-through mode.
